# Supplementary material
Source: PubMed Central journal article supplement (PMC7972793)
Supplement: mmc1.pdf [file mmc1.pdf]

**Med, Volume 2**

**Supplemental information**

**Achieving path-dependent equity for  
global COVID-19 vaccine allocation**

**Anthony D. So and Joshua Woo**

# **Achieving Path-Dependent Equity for Global COVID-19 Vaccine Allocation**

Anthony D. So<sup>1,2\*</sup> and Joshua Woo<sup>1,2</sup>

<sup>1</sup>Innovation + Design Enabling Access (IDEA) Initiative, Department of International Health, Johns Hopkins Bloomberg School of Public Health, Baltimore, Maryland, 21205, United States of America

<sup>2</sup>Transformative Technologies and Institutions Theme, Johns Hopkins Alliance for a Healthier World, Baltimore, Maryland, 21205, United States of America

**Supplemental File**

**Table S1. COVID-19 vaccines administered by country and country classifications**

| <b>Country</b>           | <b>Country Classification<sup>1*</sup></b> | <b>COVID-19 Vaccine Doses Administered<sup>2</sup></b> |
|--------------------------|--------------------------------------------|--------------------------------------------------------|
| United States of America | HIC                                        | 82,572,848                                             |
| China                    | UMIC                                       | 52,520,000                                             |
| India                    | LMIC                                       | 24,037,644                                             |
| United Kingdom           | HIC                                        | 23,773,959                                             |
| Turkey                   | UMIC                                       | 10,222,994                                             |
| Israel                   | HIC                                        | 8,731,727                                              |
| Brazil                   | UMIC                                       | 8,580,097                                              |
| Germany                  | HIC                                        | 7,681,678                                              |
| Russian Federation       | UMIC                                       | 6,694,349                                              |
| United Arab Emirates     | HIC                                        | 6,325,211                                              |
| France                   | HIC                                        | 5,807,779                                              |
| Italy                    | HIC                                        | 5,407,294                                              |
| Spain                    | HIC                                        | 4,742,602                                              |
| Morocco                  | LMIC                                       | 4,613,292                                              |
| Indonesia                | UMIC                                       | 4,534,798                                              |
| Chile                    | HIC                                        | 4,270,024                                              |
| Bangladesh               | LMIC                                       | 4,013,963                                              |
| Poland                   | HIC                                        | 4,006,643                                              |
| Mexico                   | UMIC                                       | 2,583,435                                              |
| Canada                   | HIC                                        | 2,225,278                                              |
| Romania                  | HIC                                        | 1,832,198                                              |
| Netherlands              | HIC                                        | 1,619,839                                              |
| Argentina                | UMIC                                       | 1,357,596                                              |
| Hungary                  | HIC                                        | 1,316,935                                              |
| Nepal                    | LMIC                                       | 1,106,599                                              |
| Greece                   | HIC                                        | 1,089,250                                              |
| Portugal                 | HIC                                        | 1,032,968                                              |
| Belgium                  | HIC                                        | 990,335                                                |
| Sweden                   | HIC                                        | 985,681                                                |
| Switzerland              | HIC                                        | 948,678                                                |
| Czechia                  | HIC                                        | 834,427                                                |
| Austria                  | HIC                                        | 830,688                                                |
| Serbia                   | UMIC                                       | 750,533                                                |
| Denmark                  | HIC                                        | 742,695                                                |
| Sri Lanka                | LMIC                                       | 737,062                                                |
| Singapore                | HIC                                        | 611,314                                                |
| Norway                   | HIC                                        | 584,212                                                |
| Finland                  | HIC                                        | 575,433                                                |
| Slovakia                 | HIC                                        | 544,986                                                |
| Ireland                  | HIC                                        | 530,197                                                |
| Bahrain                  | HIC                                        | 514,559                                                |
| Republic of Korea        | HIC                                        | 446,941                                                |
| Peru                     | UMIC                                       | 347,241                                                |
| Qatar                    | HIC                                        | 327,000                                                |
| Dominican Republic       | UMIC                                       | 303,490                                                |
| Saudi Arabia             | HIC                                        | 295,530                                                |
| Bulgaria                 | UMIC                                       | 294,133                                                |
| Lithuania                | HIC                                        | 292,261                                                |
| Croatia                  | HIC                                        | 264,703                                                |
| Pakistan                 | LMIC                                       | 227,917                                                |
| Slovenia                 | HIC                                        | 207,287                                                |
| Colombia                 | UMIC                                       | 206,475                                                |
| Maldives                 | UMIC                                       | 165,675                                                |
| Panama                   | HIC                                        | 150,411                                                |
| Costa Rica               | UMIC                                       | 149,812                                                |
| Estonia                  | HIC                                        | 146,083                                                |
| Azerbaijan               | UMIC                                       | 143,115                                                |
| Malaysia                 | UMIC                                       | 139,720                                                |
| South Africa             | UMIC                                       | 107,054                                                |

|                                  |      |         |
|----------------------------------|------|---------|
| Myanmar                          | LMIC | 104,865 |
| Jordan                           | UMIC | 101,230 |
| Oman                             | HIC  | 98,947  |
| Cyprus                           | HIC  | 98,427  |
| Seychelles                       | HIC  | 97,779  |
| Australia                        | HIC  | 94,908  |
| Malta                            | HIC  | 92,771  |
| Latvia                           | HIC  | 82,115  |
| Algeria                          | LMIC | 75,000  |
| Lebanon                          | UMIC | 64,974  |
| Iran                             | MIC  | 60,486  |
| Uruguay                          | HIC  | 54,154  |
| Senegal                          | LMIC | 52,031  |
| Luxembourg                       | HIC  | 47,515  |
| Belarus                          | UMIC | 46,645  |
| Japan                            | HIC  | 46,469  |
| Cambodia                         | LMIC | 44,918  |
| Barbados                         | HIC  | 44,859  |
| Ecuador                          | UMIC | 42,114  |
| Iceland                          | HIC  | 41,989  |
| Zimbabwe                         | LMIC | 35,761  |
| Jersey                           | HIC  | 33,511  |
| Afghanistan                      | LIC  | 31,150  |
| Ukraine                          | LMIC | 29,584  |
| Isle of Man                      | HIC  | 26,172  |
| Cayman Islands                   | HIC  | 25,408  |
| Kazakhstan                       | UMIC | 22,294  |
| Guernsey                         | HIC  | 22,040  |
| Bermuda                          | HIC  | 20,705  |
| Bolivia                          | LMIC | 20,025  |
| Thailand                         | UMIC | 17,697  |
| El Salvador                      | LMIC | 16,300  |
| Mongolia                         | LMIC | 15,432  |
| Philippines                      | LMIC | 13,629  |
| Venezuela                        | UMIC | 12,194  |
| Dominica                         | UMIC | 10,476  |
| New Zealand                      | HIC  | 9,431   |
| Aruba                            | HIC  | 8,882   |
| Faroe Islands                    | HIC  | 8,068   |
| Anguilla                         | HIC  | 7,700   |
| Palestine                        | --   | 6,360   |
| Turks and Caicos Islands         | HIC  | 6,347   |
| Moldova                          | LMIC | 5,390   |
| Greenland                        | HIC  | 3,927   |
| Mauritius                        | HIC  | 3,843   |
| North Macedonia                  | UMIC | 3,536   |
| Lao People's Democratic Republic | LMIC | 3,341   |
| British Virgin Islands           | HIC  | 3,334   |
| Equatorial Guinea                | UMIC | 3,222   |
| Liechtenstein                    | HIC  | 3,126   |
| Grenada                          | UMIC | 3,061   |
| Honduras                         | LMIC | 2,787   |
| Montenegro                       | UMIC | 2,629   |
| Andorra                          | HIC  | 2,526   |
| Kuwait                           | HIC  | 2,500   |
| Guatemala                        | UMIC | 2,427   |
| Monaco                           | HIC  | 2,400   |
| Saint Vincent and the Grenadines | UMIC | 2,280   |
| San Marino                       | HIC  | 2,251   |
| Iraq                             | UMIC | 2,177   |
| Guyana                           | UMIC | 2,050   |

|                          |      |             |
|--------------------------|------|-------------|
| Falkland Islands         | HIC  | 1,732       |
| Paraguay                 | UMIC | 1,725       |
| Saint Kitts and Nevis    | HIC  | 1,631       |
| Saint Lucia              | UMIC | 1,460       |
| Egypt                    | LMIC | 1,315       |
| Trinidad and Tobago      | HIC  | 1,137       |
| Montserrat               | HIC  | 859         |
| Suriname                 | UMIC | 729         |
| Belize                   | UMIC | 673         |
| Albania                  | UMIC | 671         |
| Ivory Coast              | LMIC | 660         |
| Antigua and Barbuda      | HIC  | 383         |
| Nigeria                  | LMIC | 80          |
| Uganda                   | LIC  | 80          |
| Angola                   | LMIC | 1           |
| Curacao                  | HIC  | 1           |
| Gambia                   | LIC  | 1           |
| Kenya                    | LMIC | 1           |
| Marshall Islands         | UMIC | 1           |
| Micronesia               | LMIC | 1           |
| Nicaragua                | LMIC | 1           |
| Togo                     | LIC  | 1           |
| Total Doses Administered | --   | 298,957,960 |

\*HIC = high-income country; UMIC = upper-middle-income country; LMIC = lower-middle-income country; LIC = low-income country

<sup>1</sup>Country classifications based on World Bank 2021 classifications, available at:

<https://datahelpdesk.worldbank.org/knowledgebase/articles/906519-world-bank-country-and-lending-groups>.

<sup>2</sup>Vaccine administration data sourced from the World Health Organization Coronavirus (COVID-19) Dashboard, as of March 11, 2021. Available at: <https://covid19.who.int/>.

\*\*Per cent of COVID-19 vaccines administered to HICs calculated by the formula:  $\frac{\text{total doses administered to HICs}}{\text{total doses administered}}$

**Table S2.** COVAX distribution portfolio for COVID-19 vaccines

|                | <b>Goal for Total COVID-19 Vaccine Doses by 2021<sup>1</sup></b> | <b>Total COVID-19 Vaccine Doses Procured<sup>2</sup></b>                                                   | <b>COVID-19 Vaccine Rollout within Q1/Q2 2021<sup>3</sup></b>  |
|----------------|------------------------------------------------------------------|------------------------------------------------------------------------------------------------------------|----------------------------------------------------------------|
| COVAX Facility | 2B doses                                                         | Pfizer/BioNTech: 40M<br>AstraZeneca/Oxford: 270M<br>Novavax: 100M<br>J&J/Janssen: 500M<br>Sanofi/GSK: 200M | AstraZeneca and AstraZeneca/SII: 237M<br>Pfizer/BioNTech: 1.2M |

<sup>1</sup>COVAX goal for COVID-19 vaccine supply by end-of-year 2021 sourced from COVAX briefing document. Available at: <https://www.who.int/news/item/18-12-2020-covax-announces-additional-deals-to-access-promising-covid-19-vaccine-candidates-plans-global-rollout-starting-q1-2021>.

<sup>2</sup>COVID-19 vaccine reservation data sourced from UNICEF's COVID-19 Vaccine Market Dashboard, as of March 12, 2021. Available at: <https://www.unicef.org/supply/covid-19-vaccine-market-dashboard>.

<sup>3</sup>COVID-19 anticipated vaccine distribution for Q1/Q2 2021 sourced from COVAX's interim distribution forecast, as of March 2, 2021. Available at: <https://www.gavi.org/sites/default/files/covid/covax/COVAX-First-round-allocation-of-AZ-and-SII.pdf>.

\*Per cent of year-end goal met by COVAX calculated by the formula:  $\frac{\text{COVID-19 vaccine rollout within Q1/Q2 of 2021}}{\text{Goal for total doses by 2021}}$

**Table S3.** Approved COVID-19 vaccine doses reserved by G7 countries relative to country population

| <b>Country</b> | <b>Country Population<sup>1</sup></b> | <b>Approved COVID-19 Vaccine Courses Reserved<sup>2</sup></b> |
|----------------|---------------------------------------|---------------------------------------------------------------|
| Canada         | 37,589,260                            | 90,000,000                                                    |
| European Union | 447,512,041                           | 492,500,000                                                   |
| France         | 126,264,930                           | --                                                            |
| Germany        | 83,132,800                            | 15,000,000                                                    |
| Italy          | 60,297,400                            | 35,000,000                                                    |
| Japan          | 126,264,930                           | 132,000,000                                                   |
| United Kingdom | 66,834,400                            | 78,500,000                                                    |
| United States  | 328,239,520                           | 400,000,000                                                   |

<sup>1</sup>Country population based on World Bank 2019 population data, available at: <https://data.worldbank.org/indicator/SP.POP.TOTL>.

<sup>2</sup>COVID-19 vaccine reservation data sourced from UNICEF's COVID-19 Vaccine Market Dashboard, as of March 12. Available at: <https://www.unicef.org/supply/covid-19-vaccine-market-dashboard>.

\*France, Germany and Italy are assumed to be covered under the European Union's reserved doses. All doses from vaccine manufacturers that have been granted approval or emergency use authorization are included, but it is not yet known when these vaccines will be fully administered. Janssen's COVID-19 vaccine is calculated as a one-dose vaccine; all others are two-dose vaccines.

**Table S4.** List of countries that have both signed bilateral purchase commitments and are on the list for COVAX's Q1/Q2 2021 interim distribution forecast\*

| Count | Country                |
|-------|------------------------|
| 1     | Albania                |
| 2     | Argentina              |
| 3     | Bangladesh             |
| 4     | Bolivia                |
| 5     | Bosnia and Herzegovina |
| 6     | Botswana               |
| 7     | Brazil                 |
| 8     | Canada                 |
| 9     | Chile                  |
| 10    | Colombia               |
| 11    | Costa Rica             |
| 12    | Ivory Coast            |
| 13    | Dominican Republic     |
| 14    | Ecuador                |
| 15    | Egypt                  |
| 16    | India                  |
| 17    | Indonesia              |
| 18    | Iraq                   |
| 19    | Jordan                 |
| 20    | Lebanon                |
| 21    | Malaysia               |
| 22    | Maldives               |
| 23    | Mexico                 |
| 24    | Morocco                |
| 25    | Nepal                  |
| 26    | New Zealand            |
| 27    | North Macedonia        |
| 28    | Oman                   |
| 29    | Pakistan               |
| 30    | Panama                 |
| 31    | Peru                   |
| 32    | Philippines            |
| 33    | Republic of Korea      |
| 34    | Saudi Arabia           |
| 35    | Serbia                 |
| 36    | South Africa           |
| 37    | Sri Lanka              |
| 38    | Tunisia                |
| 39    | Ukraine                |
| 40    | Uzbekistan             |
| 41    | Venezuela              |
| 42    | Vietnam                |

\*COVID-19 vaccine reservation data sourced from UNICEF's COVID-19 Vaccine Market Dashboard, as of March 12, 2021. Available at: <https://www.unicef.org/supply/covid-19-vaccine-market-dashboard>. COVID-19

Anticipated vaccine distribution for Q1/Q2 2021 sourced from COVAX's interim distribution forecast, as of February 3, 2021. Available at: [https://www.who.int/docs/default-source/coronaviruse/act-accelerator/covax/covax-interim-distribution-forecast.pdf?sfvrsn=7889475d\\_5](https://www.who.int/docs/default-source/coronaviruse/act-accelerator/covax/covax-interim-distribution-forecast.pdf?sfvrsn=7889475d_5).
